## Retraction: Hyperbaric oxygen activates discoidin domain receptor 2 via tumour necrosis factor- $\alpha$ and the p38 MAPK pathway to increase vascular smooth muscle cell migration through matrix metalloproteinase 2

Kou-Gi Shyu, Bao-Wei Wang and Hang Chang

Volume 116, issue 7 (2009) pp. 575–583

Following an investigation of Professor Kou-Gi Shyu by the Academic Ethical Issue Committee of Shin-Kong Wu Ho-Su Memorial Hospital and by Taipei Medical University, it has been recommended that this paper along with the following other papers be retracted:

Wang, B.-W., Chang, H. and Shyu, K.-G. (2009) Regulation of resistin by cyclic mechanical stretch in cultured rat vascular smooth muscle cells. *Clin. Sci.* **118**, 221–230, DOI:10.1042/CS20090155.

Shyu, K.-G., Lien, L.-M., Wang, B.-W., Kuan, P. and Chang, H. (2011) Resistin contributes to neointimal formation via oxidative stress after vascular injury. *Clin. Sci.* **120**, 121–129, DOI:10.1042/CS20100226.

Shyu, K.-G., Chen, S.-C., Wang, B.-W., Cheng, W.-P. and Hung, H.-F. (2012) Mechanism of the inhibitory effect of atorvastatin on leptin expression induced by angiotensin II in cultured human coronary artery smooth muscle cells. *Clin. Sci.* **122**, 33–42, DOI:10.1042/CS20110114.

The corresponding authors of each of these papers are aware of and agree with the retraction.

## Retraction: Regulation of resistin by cyclic mechanical stretch in cultured rat vascular smooth muscle cells

Bao-Wei Wang, Hang Chang and Kou-Gi Shyu

Volume 118, issue 3 (2009) pp. 221–230

Following an investigation of Professor Kou-Gi Shyu by the Academic Ethical Issue Committee of Shin-Kong Wu Ho-Su Memorial Hospital and by Taipei Medical University, it has been recommended that this paper along with the following other papers be retracted:

Shyu, K.-G., Wang, B.-W. and Chang, H. (2009) Hyperbaric oxygen activates discoidin domain receptor 2 via tumour necrosis factor- $\alpha$  and the p38 MAPK pathway to increase vascular smooth muscle cell migration through matrix metalloproteinase 2. *Clin. Sci.* **116**, 575–583, DOI:10.1042/CS20080215.

Shyu, K.-G., Lien, L.-M., Wang, B.-W., Kuan, P. and Chang, H. (2011) Resistin contributes to neointimal formation via oxidative stress after vascular injury. *Clin. Sci.* **120**, 121–129, DOI:10.1042/CS20100226.

Shyu, K.-G., Chen, S.-C., Wang, B.-W., Cheng, W.-P. and Hung, H.-F. (2012) Mechanism of the inhibitory effect of atorvastatin on leptin expression induced by angiotensin II in cultured human coronary artery smooth muscle cells. *Clin. Sci.* **122**, 33–42, DOI:10.1042/CS20110114.

The corresponding authors of each of these papers are aware of and agree with the retraction.

# Retraction: Resistin contributes to neointimal formation via oxidative stress after vascular injury

Kou-Gi Shyu, Li-Ming Lien, Bao-Wei Wang, Peiliang Kuan and Hang Chang

Volume 120, issue 3 (2011) pp. 121–129

Following an investigation of Professor Kou-Gi Shyu by the Academic Ethical Issue Committee of Shin-Kong Wu Ho-Su Memorial Hospital and by Taipei Medical University, it has been recommended that this paper along with the following other papers be retracted:

Shyu, K.-G., Wang, B.-W. and Chang, H. (2009) Hyperbaric oxygen activates discoidin domain receptor 2 via tumour necrosis factor- $\alpha$  and the p38 MAPK pathway to increase vascular smooth muscle cell migration through matrix metalloproteinase 2. *Clin. Sci.* **116**, 575–583, DOI:10.1042/CS20080215.

Wang, B.-W., Chang, H. and Shyu, K.-G. (2009) Regulation of resistin by cyclic mechanical stretch in cultured rat vascular smooth muscle cells. *Clin. Sci.* **118**, 221–230, DOI:10.1042/CS20090155.

Shyu, K.-G., Chen, S.-C., Wang, B.-W., Cheng, W.-P. and Hung, H.-F. (2012) Mechanism of the inhibitory effect of atorvastatin on leptin expression induced by angiotensin II in cultured human coronary artery smooth muscle cells. *Clin. Sci.* **122**, 33–42, DOI:10.1042/CS20110114.

The corresponding authors of each of these papers are aware of and agree with the retraction.

# Retraction: Mechanism of the inhibitory effect of atorvastatin on leptin expression induced by angiotensin II in cultured human coronary artery smooth muscle cells

Kou-Gi Shyu, Shih-Chung Chen, Bao-Wei Wang, Wen-Pin Cheng, Huei-Fong Hung

Volume 122, issue 1 (2012) pp. 33–42

Following an investigation of Professor Kou-Gi Shyu by the Academic Ethical Issue Committee of Shin-Kong Wu Ho-Su Memorial Hospital and by Taipei Medical University, it has been recommended that this paper along with the following other papers be retracted:

Shyu, K.-G., Wang, B.-W. and Chang, H. (2009) Hyperbaric oxygen activates discoidin domain receptor 2 via tumour necrosis factor- $\alpha$  and the p38 MAPK pathway to increase vascular smooth muscle cell migration through matrix metalloproteinase 2. *Clin. Sci.* **116**, 575–583, DOI:10.1042/CS2008021.

Wang, B.-W., Chang, H. and Shyu, K.-G. (2009) Regulation of resistin by cyclic mechanical stretch in cultured rat vascular smooth muscle cells. *Clin. Sci.* **118**, 221–230, DOI:10.1042/CS20090155.

Shyu, K.-G., Lien, L.-M., Wang, B.-W., Kuan, P. and Chang, H. (2011) Resistin contributes to neointimal formation via oxidative stress after vascular injury. *Clin. Sci.* **120**, 121–129, DOI:10.1042/CS20100226.

The corresponding authors of each of these papers are aware of and agree with the retraction.
